# Supplementary material for: Lanthanide conjugate Pr-MPO elicits anti-cancer activity by targeting lysosomal machinery and inducing zinc-dependent cataplerosis
Source: PubMed Central journal article supplement — Cell Commun Signal. 2024 Oct 19;22:509. doi: 10.1186/s12964-024-01883-5 (PMC11490180; doi:10.1186/s12964-024-01883-5), 2024-10-19

# Scans of Original Blots for Figure 2B

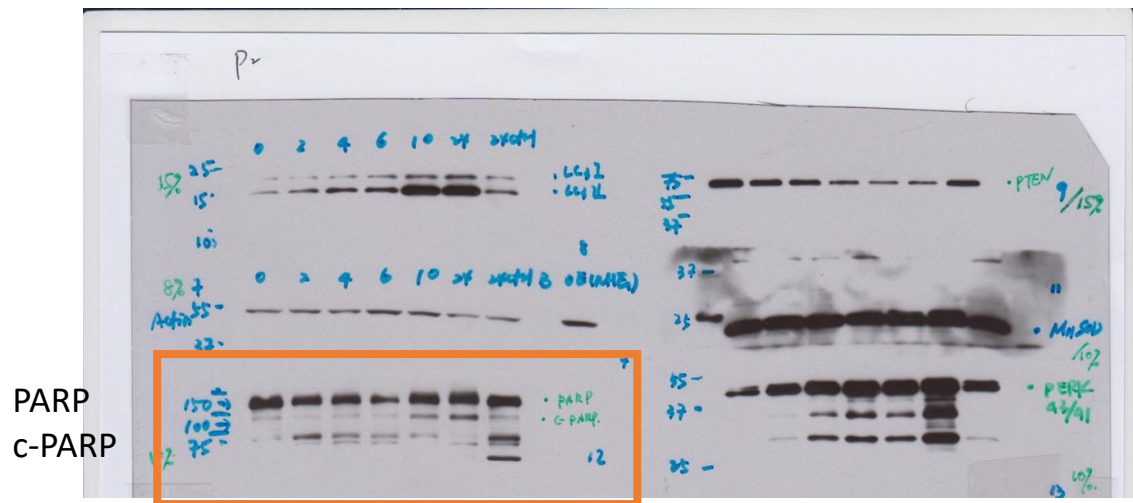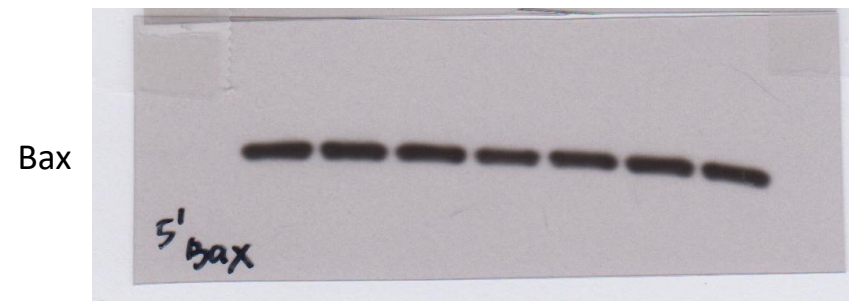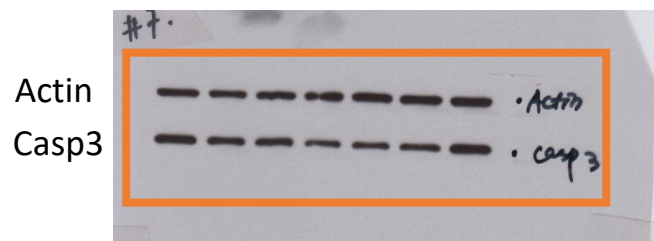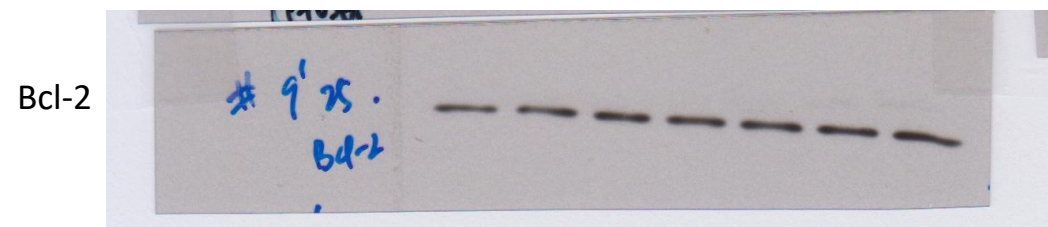

### Scan of Original Blot for Figure 2F

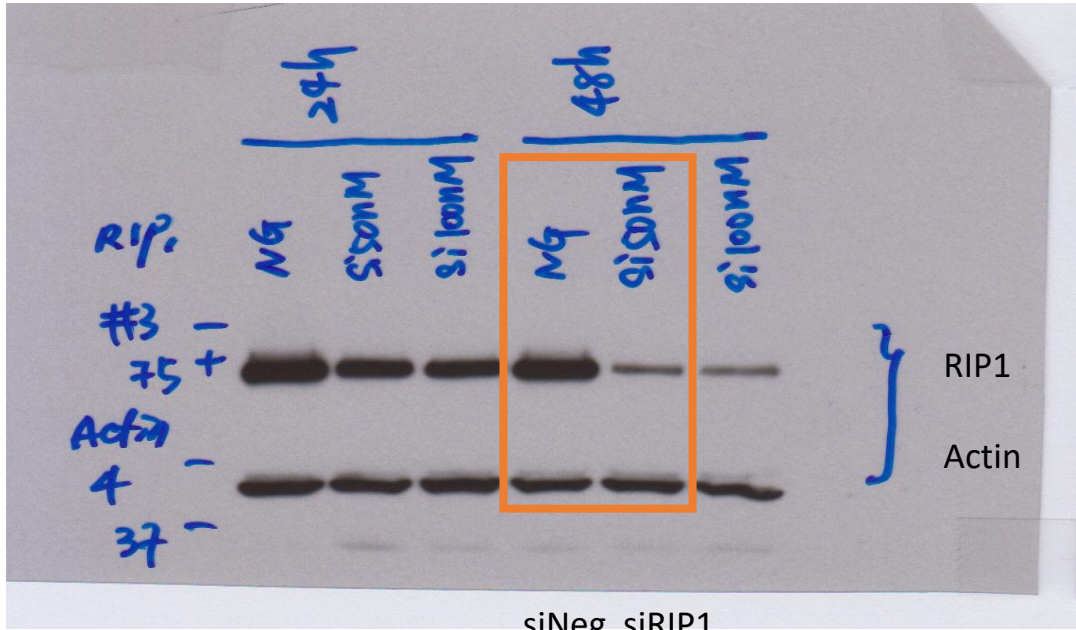

siNeg siRIP1  
(50nM)

### Scan of Original Blot for Figure 3A

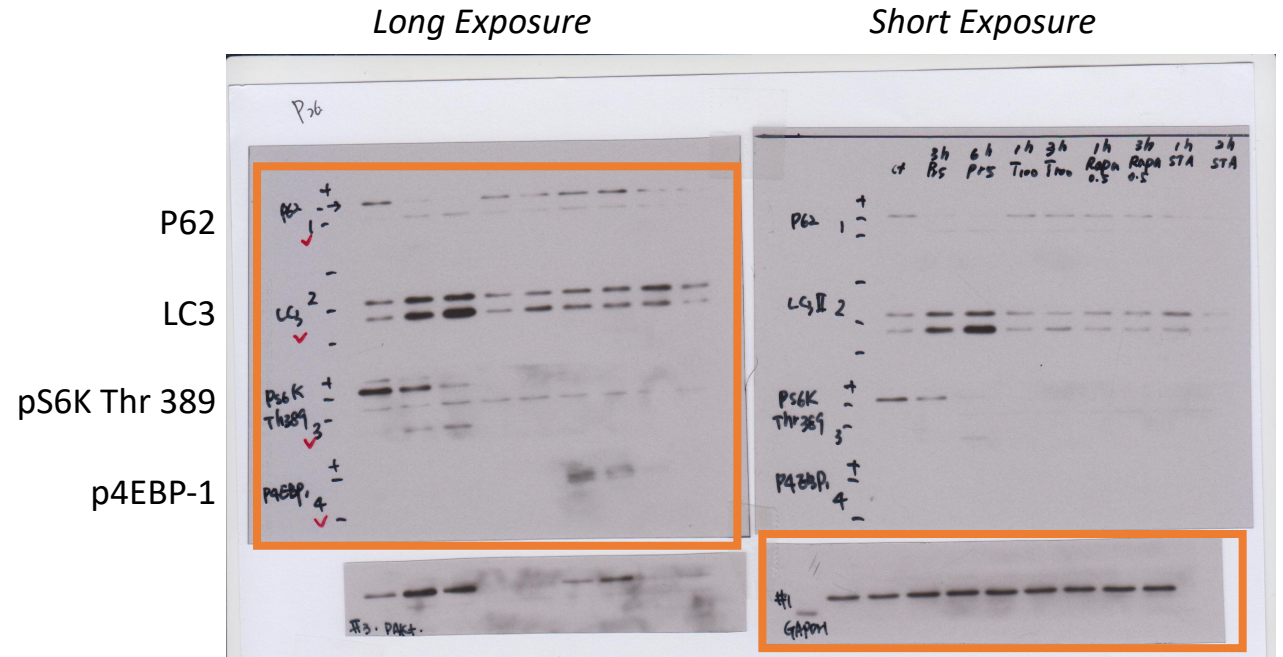

### Scans of Original Blots for Figure 3C

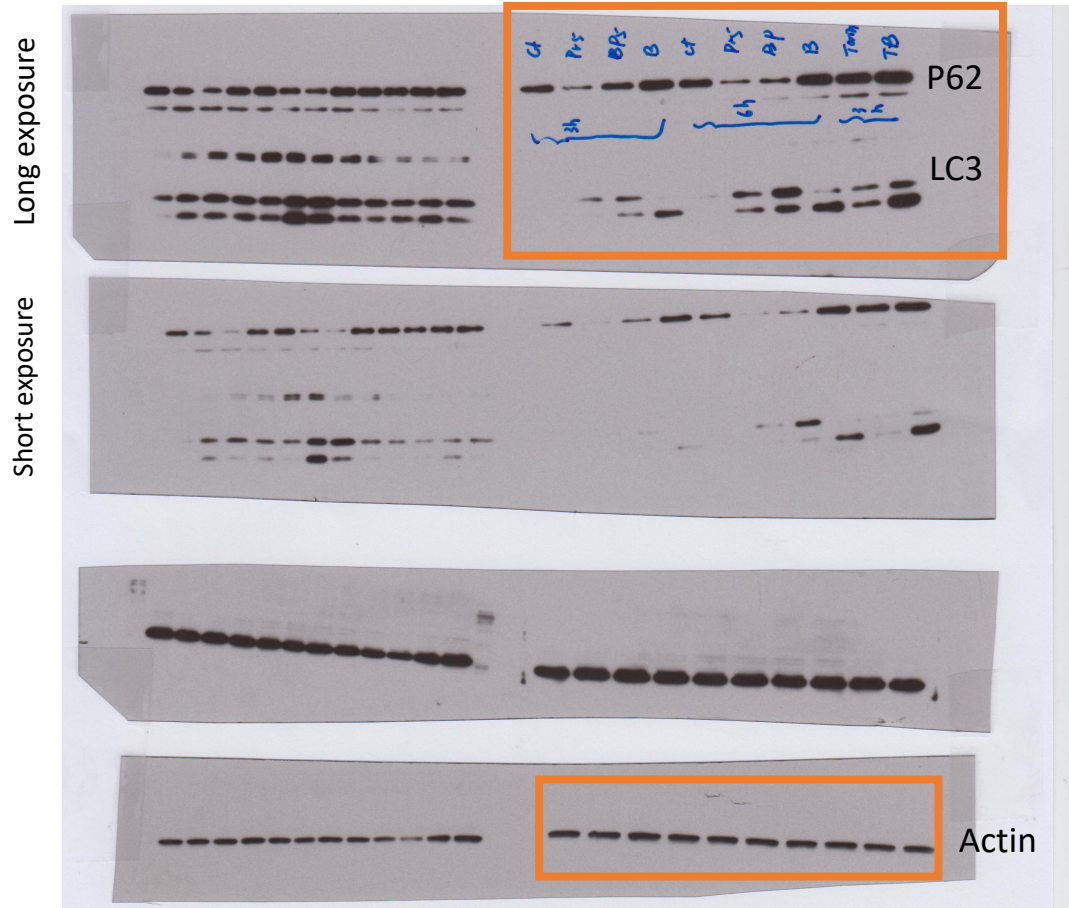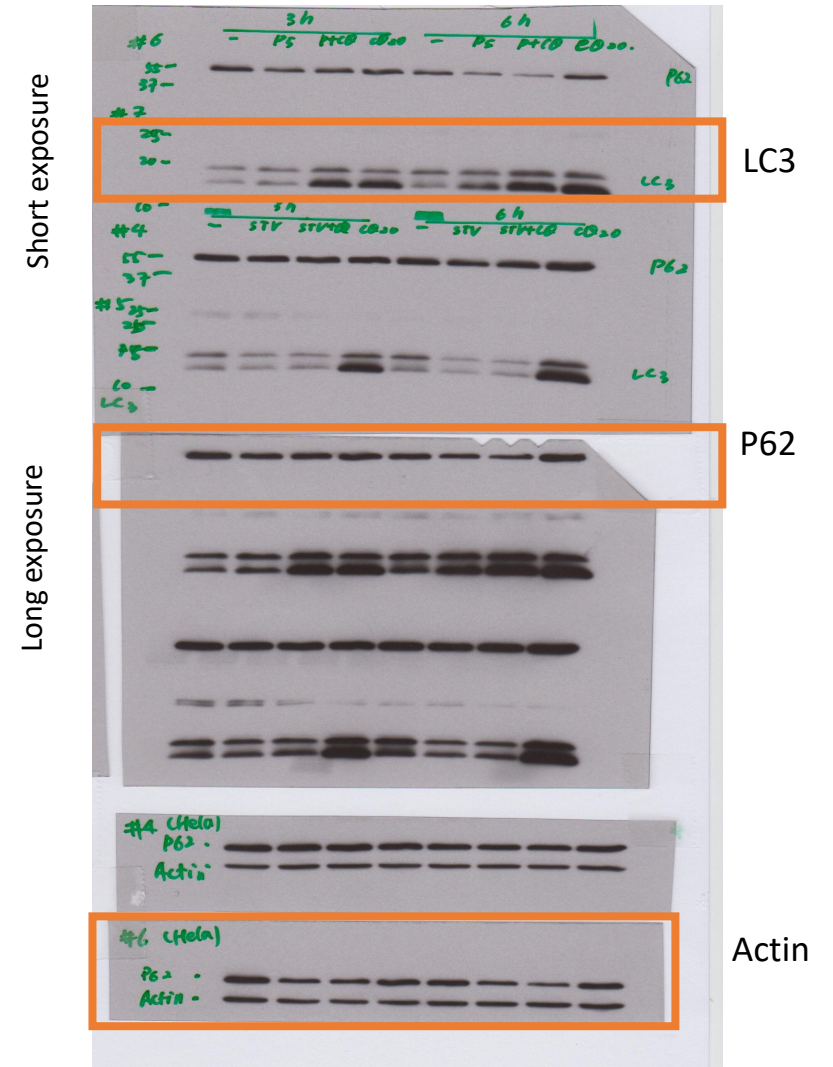







# Scans of Original Blots for Figure 3G

Long exposure

Short exposure

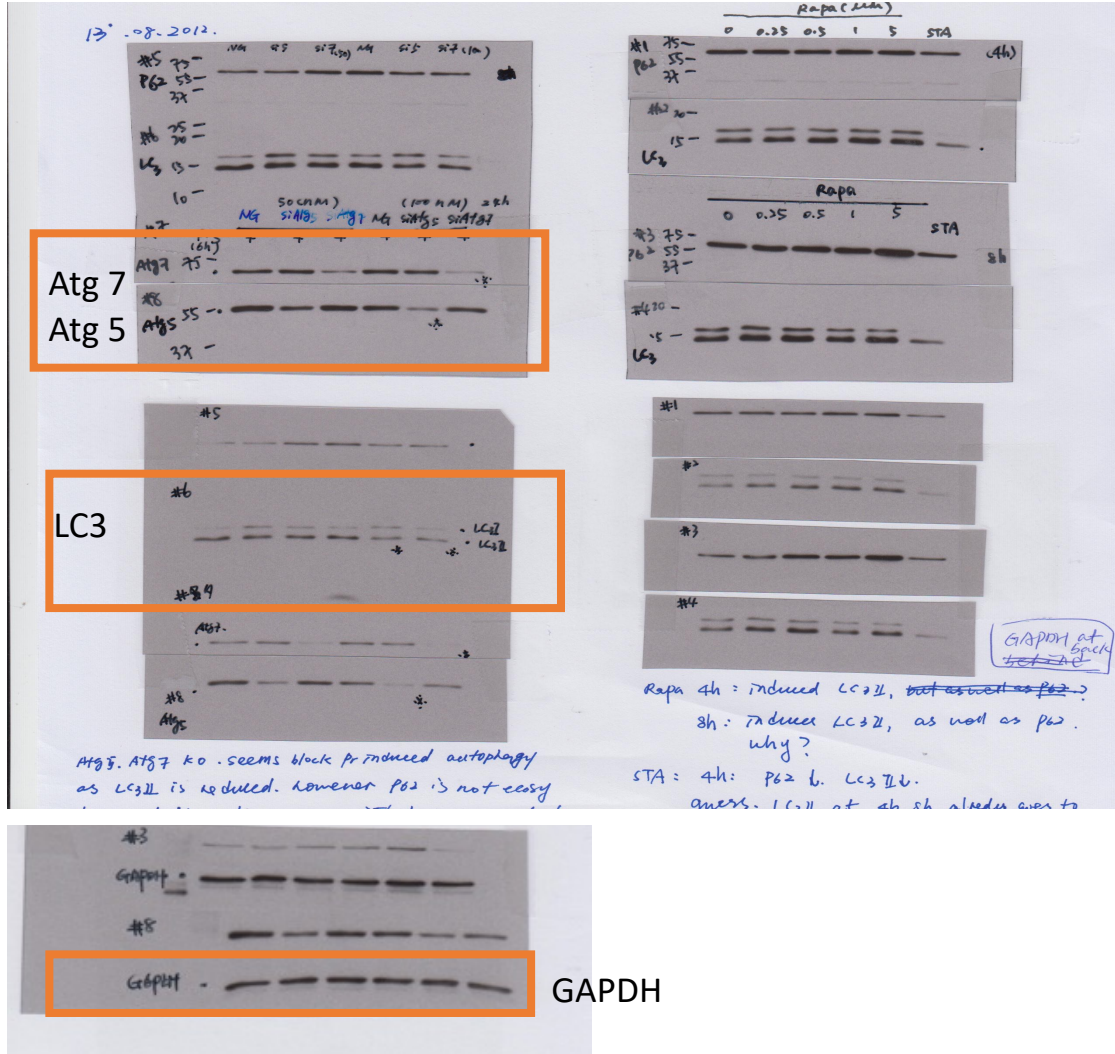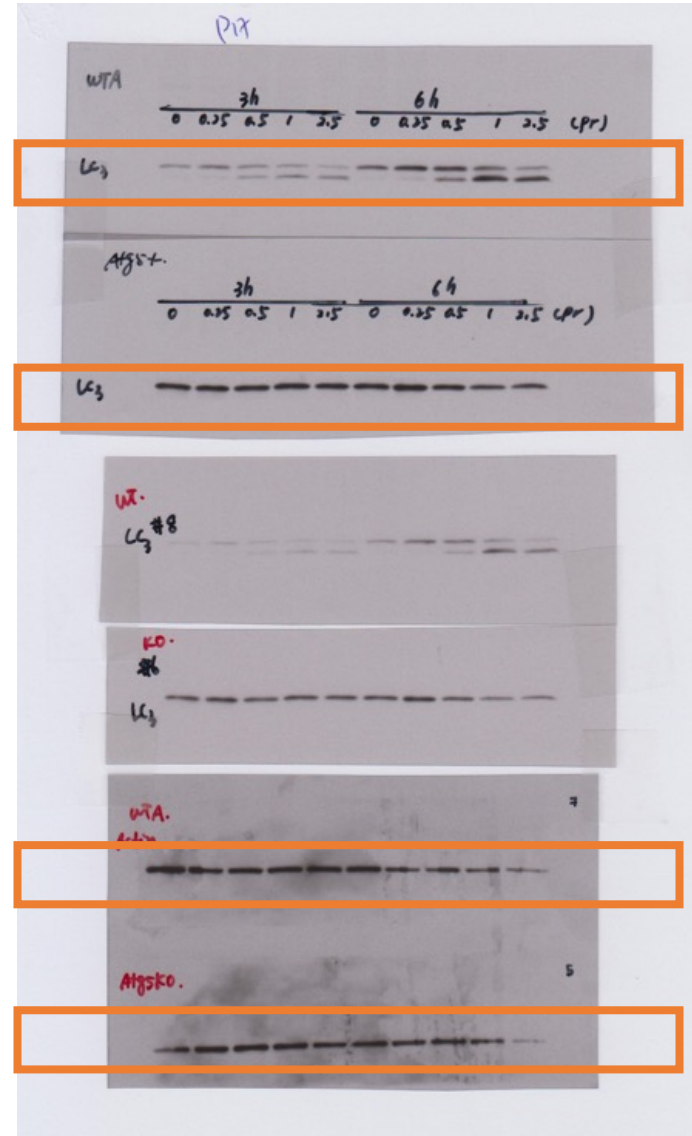

# Scans of Original Blots for Figure 4E

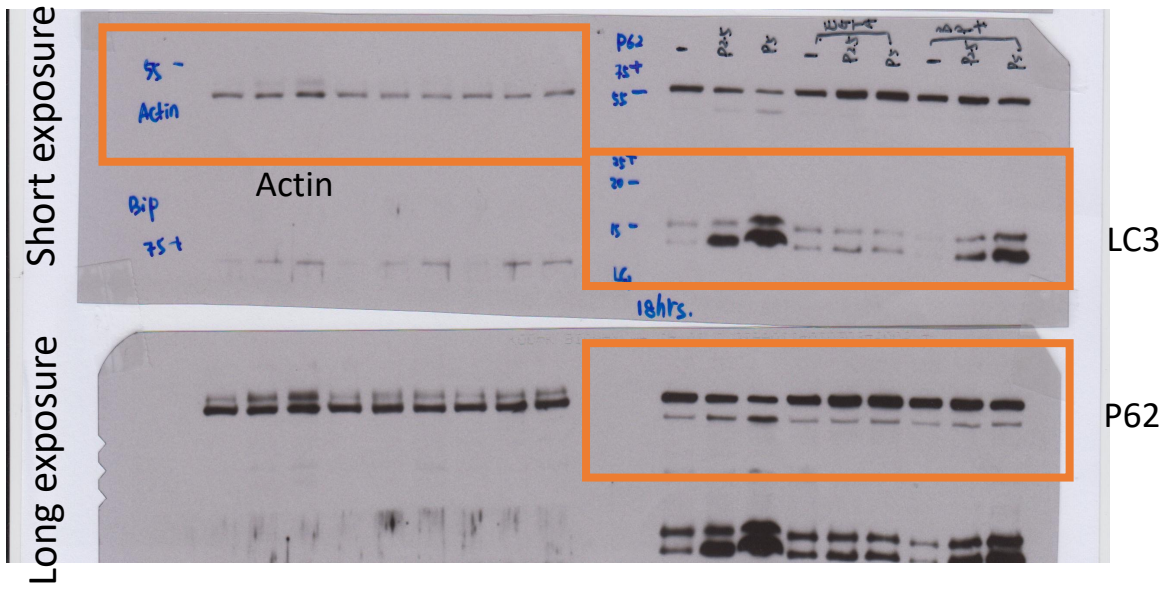

LC3

P62

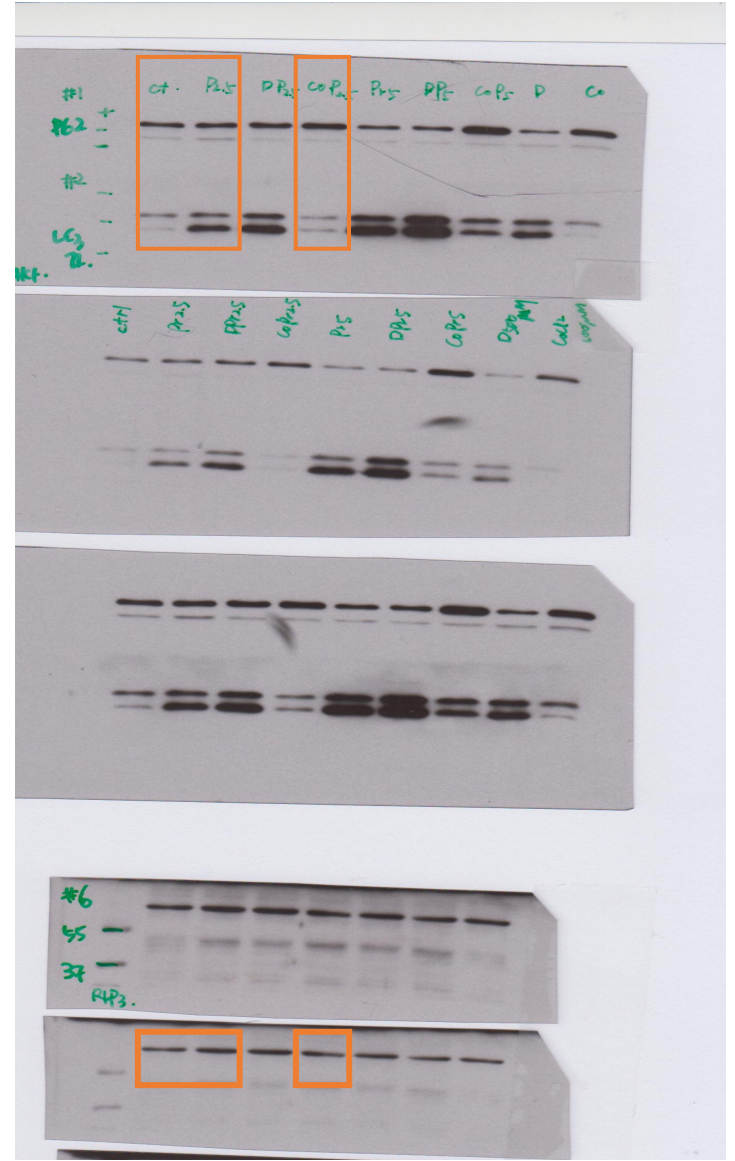



# Scans of Original Blots for Figure 6F

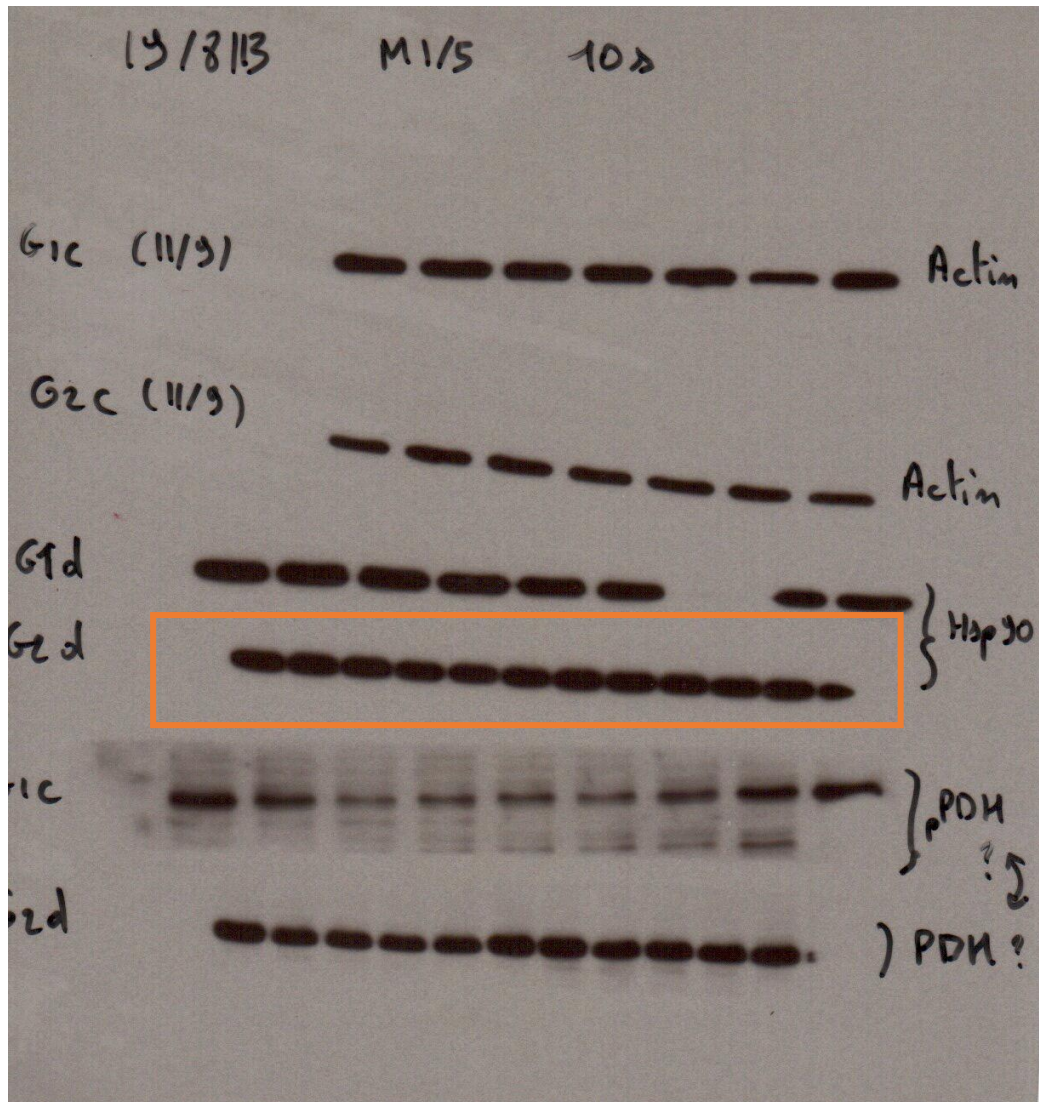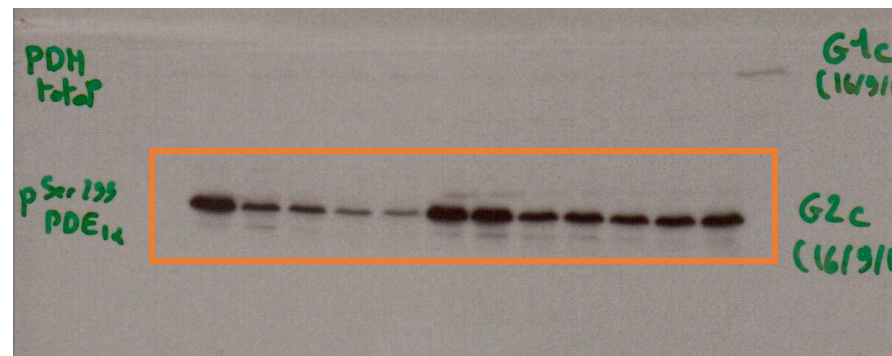



### Scans of Original Blots for Figure 7D

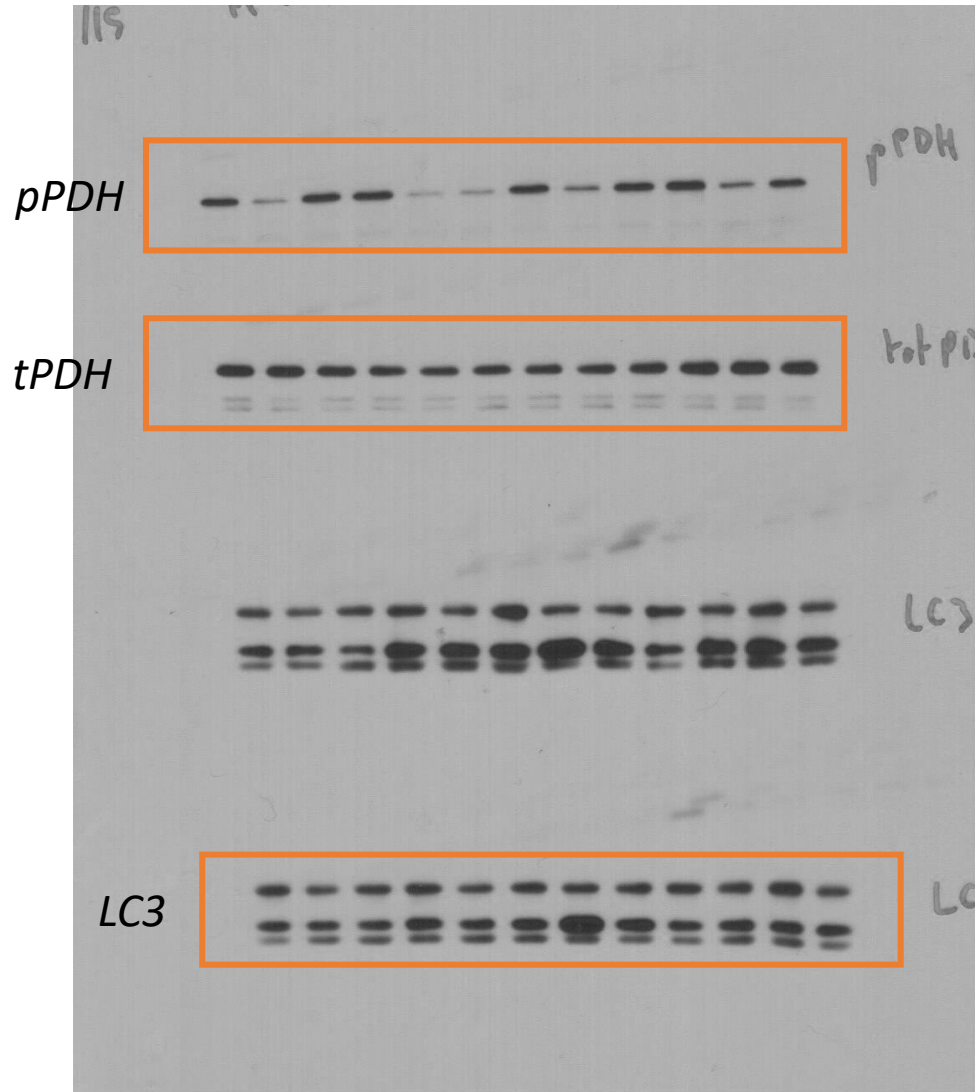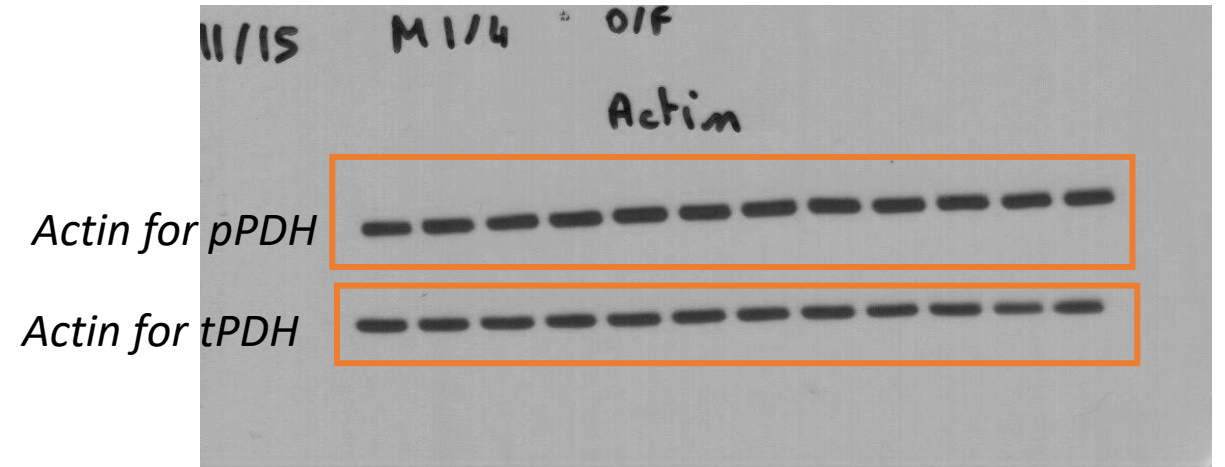

# Scans of Original Blots for Supplementary Figures S3

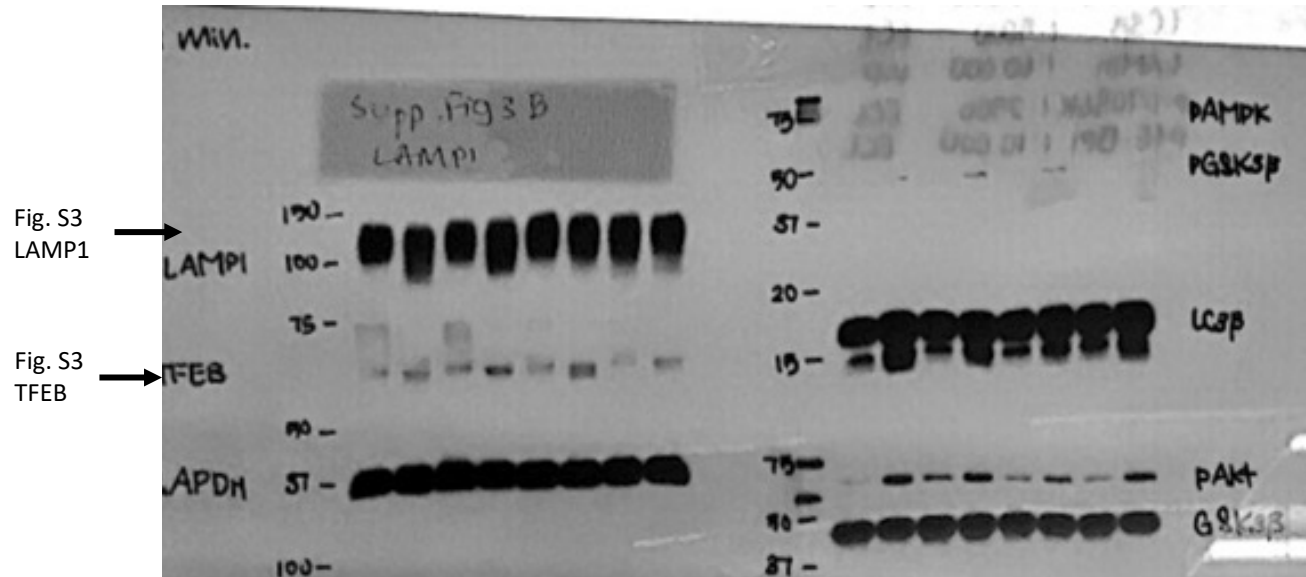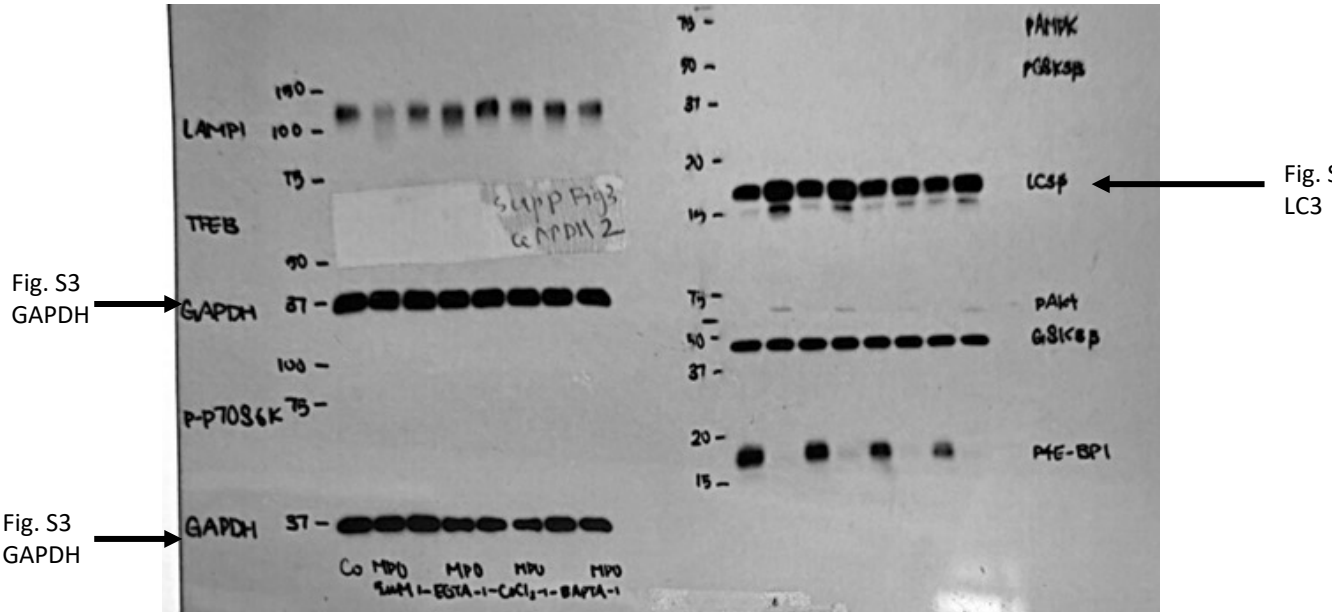

Fig. S3  
LC3

# Scans of Original Blots for Supplementary Figure S5B

Fig. S5B  
TFEB

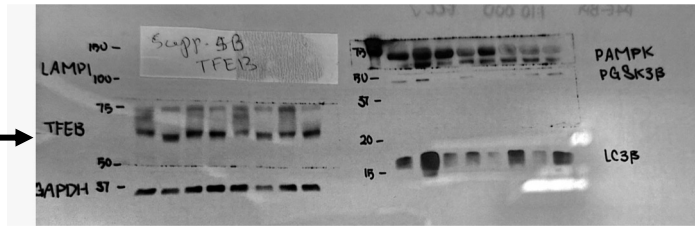

Fig. S5B  
GAPDH

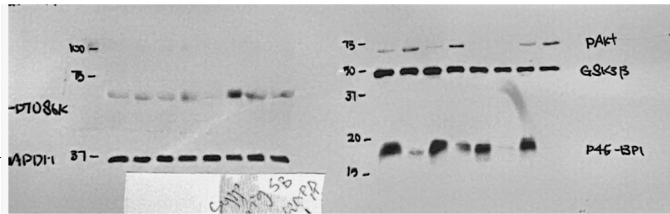

Fig. S5B  
GAPDH

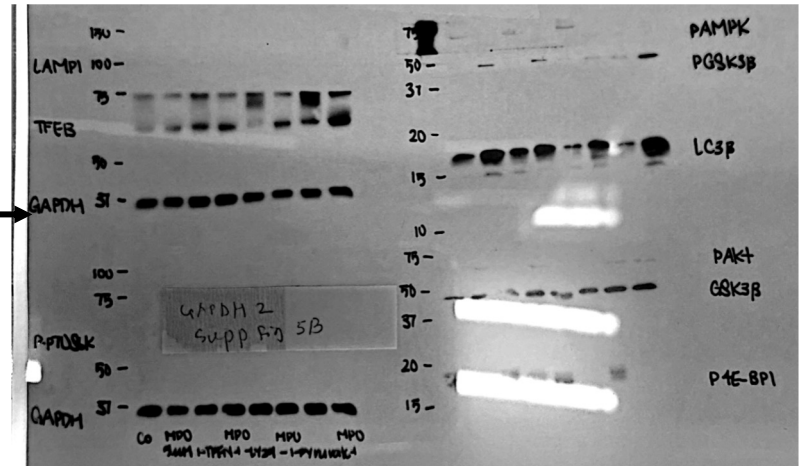

Fig. S5B  
LC3

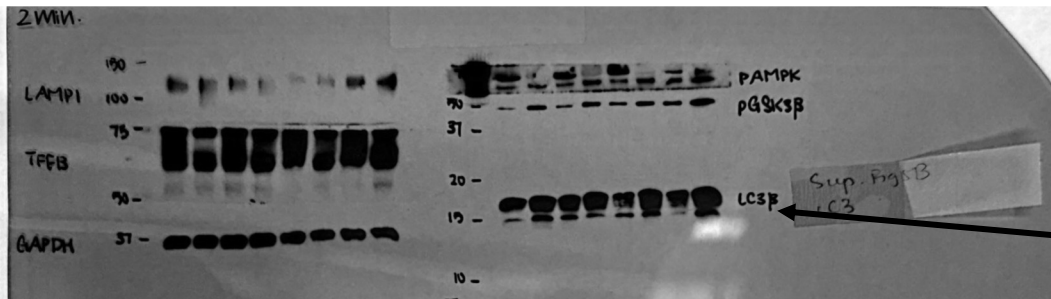

Fig. S5B  
LAMP1

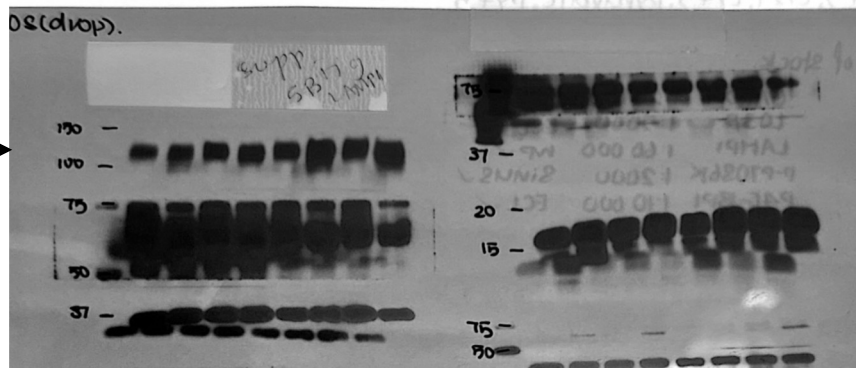



# Scans of Original Blots for Supplementary Figures S5C and D

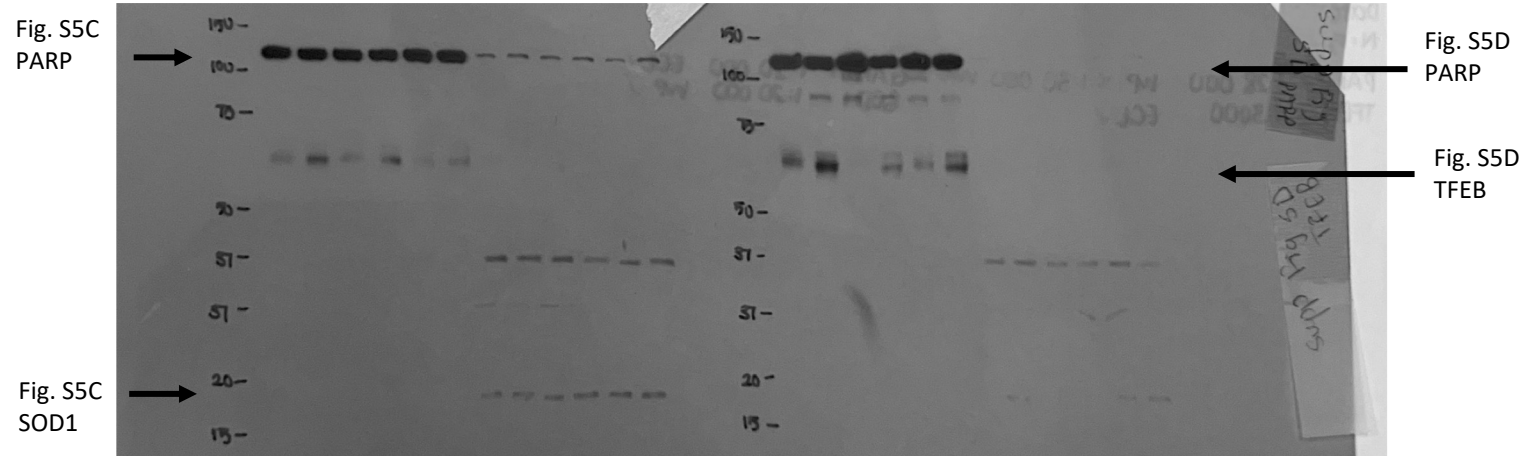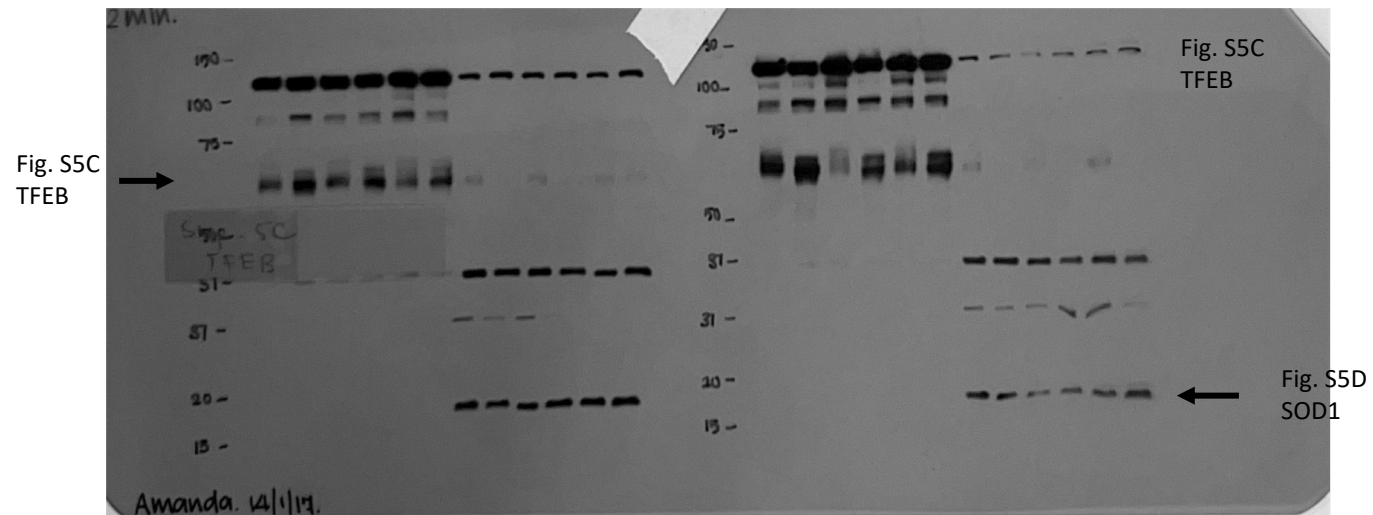

Supplement: 12964_2024_1883_MOESM2_ESM.pdf [file 12964_2024_1883_MOESM2_ESM.pdf]
